# Supplementary material for: The acidic latex protein from Hevea brasiliensis serves as an anionic antimicrobial peptide
Source: PeerJ. 2025 Apr 14;13:e19242. doi: 10.7717/peerj.19242 (PMC12005194; doi:10.7717/peerj.19242)
Supplement: Supplemental Information 1 [file peerj-13-19242-s001.xlsx]

## Sheet: B.C.
Table.1 OD600 of Hevb5 at difference concentration (dilute with 50 mM Tris-HCl pH 8.0) and Bacillus cereus time: 0 - 16 hrs
		concentration (uM)
hr		70	35	17.5	8.75	LB+bac	min		time (hrs)	B. cereus
0	#1	0.085	0.059	0.05	0.047	0.044	0.044			70				35				17.5				8.75				LB+bac
	#2	0.08	1.988	0.048	0.044	0.043	0.043			#1	#2	average	SD	#1	#2	average	SD	#1	#2	average	SD	#1	#2	average	SD	#1	#2	average	SD
1	#1	0.071	0.058	0.049	0.045	0.045			0	0	0	0	0	0	0	0	0	0	0	0	0	0	0	0	0	0	0	0	0
	minus-blank	0.027	0.014	0.005	0.001	0.001			1	0.027	0.027	0.027	9.81308e-18	0.014	0.015	0.0145	0.000707107	0.005	0.004	0.0045	0.000707107	0.001	0	0.0005	0.000707107	0.001	0.001	0.001	0
	#2	0.07	0.058	0.047	0.043	0.044			2	0.026	0.03	0.028	0.00282843	0.024	0.021	0.0225	0.00212132	0.008	0.013	0.0105	0.00353553	0.012	0.011	0.0115	0.000707107	0.004	0.003	0.0035	0.000707107
	minus-blank	0.027	0.015	0.004	0	0.001			3	0.044	0.043	0.0435	0.000707107	0.019	0.037	0.028	0.0127279	0.012	0.03	0.021	0.0127279	0.025	0.023	0.024	0.00141421	0.004	0	0.002	0.00282843
	average	0.027	0.0145	0.0045	0.0005	0.001			4	0.053	0.049	0.051	0.00282843	0.022	0.037	0.0295	0.0106066	0.042	0.049	0.0455	0.00494975	0.053	0.058	0.0555	0.00353553	0.004	0.003	0.0035	0.000707107
2	#1	0.07	0.068	0.052	0.056	0.048			5	0.048	0.052	0.05	0.00282843	0.029	0.045	0.037	0.0113137	0.105	0.117	0.111	0.00848528	0.358	0.32	0.339	0.0268701	0.002	0	0.001	0.00141421
	minus-blank	0.026	0.024	0.008	0.012	0.004			6	0.052	0.046	0.049	0.00424264	0.049	0.047	0.048	0.00141421	0.385	0.37	0.3775	0.0106066	0.556	0.574	0.565	0.0127279	0.006	0.007	0.0065	0.000707107
	#2	0.073	0.064	0.056	0.054	0.046			7	0.054	0.044	0.049	0.00707107	0.083	0.071	0.077	0.00848528	0.747	0.715	0.731	0.0226274	0.741	0.741	0.741	0	0.032	0.034	0.033	0.00141421
	minus-blank	0.03	0.021	0.013	0.011	0.003			8	0.051	0.047	0.049	0.00282843	0.169	0.131	0.15	0.0268701	0.802	0.806	0.804	0.00282843	0.811	0.801	0.806	0.00707107	0.538	0.478	0.508	0.0424264
	average	0.028	0.0225	0.0105	0.0115	0.0035			9	0.052	0.044	0.048	0.00565685	0.56	0.507	0.5335	0.0374767	0.892	0.876	0.884	0.0113137	0.854	0.871	0.8625	0.0120208	0.968	0.952	0.96	0.0113137
3	#1	0.088	0.063	0.056	0.069	0.048			10	0.05	0.046	0.048	0.00282843	0.79	0.667	0.7285	0.0869741	0.982	0.979	0.9805	0.00212132	0.965	0.997	0.981	0.0226274	1.303	1.312	1.3075	0.00636396
	minus-blank	0.044	0.019	0.012	0.025	0.004			11	0.064	0.06	0.062	0.00282843	0.938	0.786	0.862	0.10748	1.136	1.079	1.1075	0.0403051	1.066	1.044	1.055	0.0155563	1.508	1.445	1.4765	0.0445477
	#2	0.086	0.08	0.073	0.066	0.043			12	0.141	0.149	0.145	0.00565685	1.026	1.013	1.0195	0.00919239	1.257	1.265	1.261	0.00565685	1.206	1.187	1.1965	0.013435	1.638	1.612	1.625	0.0183848
	minus-blank	0.043	0.037	0.03	0.023	0			13	0.183	0.309	0.246	0.0890955	1.262	1.095	1.1785	0.118087	1.317	1.35	1.3335	0.0233345	1.282	1.273	1.2775	0.00636396	1.725	1.748	1.7365	0.0162635
	average	0.0435	0.028	0.021	0.024	0.002			14	0.293	0.495	0.394	0.142836	1.294	1.204	1.249	0.0636396	1.384	1.45	1.417	0.046669	1.392	1.314	1.353	0.0551543	1.71	1.779	1.7445	0.0487904
4	#1	0.097	0.066	0.086	0.097	0.048			15	0.413	0.632	0.5225	0.154856	1.382	1.489	1.4355	0.0756604	1.519	1.547	1.533	0.019799	1.461	1.416	1.4385	0.0318198	1.831	1.842	1.8365	0.00777817
	minus-blank	0.053	0.022	0.042	0.053	0.004			16	0.628	0.617	0.6225	0.00777817	1.577	1.57	1.5735	0.00494975	1.551	1.553	1.552	0.00141421	1.512	1.476	1.494	0.0254558	1.952	1.997	1.9745	0.0318198
	#2	0.092	0.08	0.092	0.101	0.046
	minus-blank	0.049	0.037	0.049	0.058	0.003
	average	0.051	0.0295	0.0455	0.0555	0.0035
5	#1	0.092	0.073	0.149	0.402	0.046
	minus-blank	0.048	0.029	0.105	0.358	0.002
	#2	0.095	0.088	0.16	0.363	0.043
	minus-blank	0.052	0.045	0.117	0.32	0
	average	0.05	0.037	0.111	0.339	0.001
6	#1	0.096	0.093	0.429	0.6	0.05
	minus-blank	0.052	0.049	0.385	0.556	0.006
	#2	0.089	0.09	0.413	0.617	0.05
	minus-blank	0.046	0.047	0.37	0.574	0.007
	average	0.049	0.048	0.3775	0.565	0.0065
7	#1	0.098	0.127	0.791	0.785	0.076
	minus-blank	0.054	0.083	0.747	0.741	0.032
	#2	0.087	0.114	0.758	0.784	0.077
	minus-blank	0.044	0.071	0.715	0.741	0.034
	average	0.049	0.077	0.731	0.741	0.033
8	#1	0.095	0.213	0.846	0.855	0.582
	minus-blank	0.051	0.169	0.802	0.811	0.538
	#2	0.09	0.174	0.849	0.844	0.521
	minus-blank	0.047	0.131	0.806	0.801	0.478
	average	0.049	0.15	0.804	0.806	0.508
9	#1	0.096	0.604	0.936	0.898	1.012
	minus-blank	0.052	0.56	0.892	0.854	0.968
	#2	0.087	0.55	0.919	0.914	0.995
	minus-blank	0.044	0.507	0.876	0.871	0.952
	average	0.048	0.5335	0.884	0.8625	0.96
10	#1	0.094	0.834	1.026	1.009	1.347
	minus-blank	0.05	0.79	0.982	0.965	1.303
	#2	0.089	0.71	1.022	1.04	1.355
	minus-blank	0.046	0.667	0.979	0.997	1.312
	average	0.048	0.7285	0.9805	0.981	1.3075
11	#1	0.108	0.982	1.18	1.11	1.552
	minus-blank	0.064	0.938	1.136	1.066	1.508
	#2	0.103	0.829	1.122	1.087	1.488
	minus-blank	0.06	0.786	1.079	1.044	1.445
	average	0.062	0.862	1.1075	1.055	1.4765
12	#1	0.185	1.07	1.301	1.25	1.682
	minus-blank	0.141	1.026	1.257	1.206	1.638
	#2	0.192	1.056	1.308	1.23	1.655
	minus-blank	0.149	1.013	1.265	1.187	1.612
	average	0.145	1.0195	1.261	1.1965	1.625
13	#1	0.227	1.306	1.361	1.326	1.769
	minus-blank	0.183	1.262	1.317	1.282	1.725
	#2	0.352	1.138	1.393	1.316	1.791
	minus-blank	0.309	1.095	1.35	1.273	1.748
	average	0.246	1.1785	1.3335	1.2775	1.7365
14	#1	0.337	1.338	1.428	1.436	1.754
	minus-blank	0.293	1.294	1.384	1.392	1.71
	#2	0.538	1.247	1.493	1.357	1.822
	minus-blank	0.495	1.204	1.45	1.314	1.779
	average	0.394	1.249	1.417	1.353	1.7445
15	#1	0.457	1.426	1.563	1.505	1.875
	minus-blank	0.413	1.382	1.519	1.461	1.831
	#2	0.675	1.532	1.59	1.459	1.885
	minus-blank	0.632	1.489	1.547	1.416	1.842
	average	0.5225	1.4355	1.533	1.4385	1.8365
16	#1	0.672	1.621	1.595	1.556	1.996
	minus-blank	0.628	1.577	1.551	1.512	1.952
	#2	0.66	1.613	1.596	1.519	2.04
	minus-blank	0.617	1.57	1.553	1.476	1.997
	average	0.6225	1.5735	1.552	1.494	1.9745

## Sheet: E.C.
Table.1 OD600 of Hevb5 at difference concentration (dilute with 50 mM Tris-HCl pH 8.0) and Escherichia coli time: 0 - 16 hrs
		concentration (uM)
hr		70	35	17.5	8.75	LB+bac	min		time (hrs)	E. coli
0	#1	0.119	0.063	0.069	0.047	0.045	0.045			70				35				17.5				8.75				LB+bac
	#2	0.28	0.064	0.058	0.051	0.045	0.045			#1	#2	average	SD	#1	#2	average	SD	#1	#2	average	SD	#1	#2	average	SD	#1	#2	average	select	SD
1	#1	0.084	0.065	0.054	0.05	0.053			0	0	0	0	0	0	0	0	0	0	0	0	0	0	0	0	0	0	0	0	0	0
	minus-blank	0.039	0.02	0.009	0.005	0.008			1	0.039	0.036	0.0375	0.00212132	0.02	0.019	0.0195	0.000707107	0.009	0.015	0.012	0.00424264	0.005	0.007	0.006	0.00141421	0.008	0.008	0.008	0.008	0
	#2	0.081	0.064	0.06	0.052	0.053			2	0.052	0.083	0.0675	0.0219203	0.077	0.075	0.076	0.00141421	0.034	0.071	0.0525	0.026163	0.072	0.067	0.0695	0.00353553	0.068	0.062	0.065	0.065	0.00424264
	minus-blank	0.036	0.019	0.015	0.007	0.008			3	0.067	0.098	0.0825	0.0219203	0.117	0.116	0.1165	0.000707107	0.083	0.123	0.103	0.0282843	0.125	0.13	0.1275	0.00353553	0.191	0.191	0.191	0.191	0
	average	0.0375	0.0195	0.012	0.006	0.008			4	0.075	0.112	0.0935	0.026163	0.138	0.186	0.162	0.0339411	0.259	0.257	0.258	0.00141421	0.212	0.234	0.223	0.0155563	0.428	0.457	0.4425	0.4425	0.0205061
2	#1	0.097	0.122	0.079	0.117	0.113			5	0.112	0.128	0.12	0.0113137	0.273	0.3	0.2865	0.0190919	0.342	0.376	0.359	0.0240416	0.381	0.402	0.3915	0.0148492	0.642	0.621	0.6315	0.6315	0.0148492
	minus-blank	0.052	0.077	0.034	0.072	0.068			6	0.124	0.142	0.133	0.0127279	0.428	0.446	0.437	0.0127279	0.505	0.524	0.5145	0.013435	0.545	0.561	0.553	0.0113137	0.781	0.736	0.7585	0.7585	0.0318198
	#2	0.128	0.12	0.116	0.112	0.107			7	0.136	0.146	0.141	0.00707107	0.559	0.591	0.575	0.0226274	0.698	0.661	0.6795	0.026163	0.692	0.748	0.72	0.039598	1.019	1.032	1.0255	1.0255	0.00919239
	minus-blank	0.083	0.075	0.071	0.067	0.062			8	0.174	0.19	0.182	0.0113137	0.684	0.697	0.6905	0.00919239	0.812	0.779	0.7955	0.0233345	0.814	0.864	0.839	0.0353553	1.103	1.127	1.115	1.115	0.0169706
	average	0.0675	0.076	0.0525	0.0695	0.065			9	0.206	0.223	0.2145	0.0120208	0.746	0.741	0.7435	0.00353553	0.888	0.878	0.883	0.00707107	0.919	0.912	0.9155	0.00494975	1.167	1.215	1.191	1.191	0.0339411
3	#1	0.112	0.162	0.128	0.17	0.236			10	0.217	0.24	0.2285	0.0162635	0.78	0.797	0.7885	0.0120208	0.976	0.964	0.97	0.00848528	0.953	0.95	0.9515	0.00212132	1.235	1.292	1.2635	1.2635	0.0403051
	minus-blank	0.067	0.117	0.083	0.125	0.191			11	0.243	0.27	0.2565	0.0190919	0.829	0.847	0.838	0.0127279	1.036	0.98	1.008	0.039598	0.996	0.995	0.9955	0.000707107	1.288	1.33	1.309	1.309	0.0296985
	#2	0.143	0.161	0.168	0.175	0.236			12	0.277	0.288	0.2825	0.00777817	0.85	0.863	0.8565	0.00919239	1.089	1.05	1.0695	0.0275772	1.067	1.074	1.0705	0.00494975	1.332	1.383	1.3575	1.3575	0.0360624
	minus-blank	0.098	0.116	0.123	0.13	0.191			13	0.285	0.289	0.287	0.00282843	0.877	0.878	0.8775	0.000707107	1.092	1.102	1.097	0.00707107	1.093	1.091	1.092	0.00141421	1.368	1.42	1.394	1.394	0.0367696
	average	0.0825	0.1165	0.103	0.1275	0.191			14	0.294	0.297	0.2955	0.00212132	0.844	0.847	0.8455	0.00212132	1.118	1.123	1.1205	0.00353553	1.132	1.178	1.155	0.0325269	1.409	1.453	1.431	1.431	0.0311127
4	#1	0.12	0.183	0.304	0.257	0.473			15	0.364	0.367	0.3655	0.00212132	0.645	0.617	0.631	0.019799	1.13	1.132	1.131	0.00141421	1.179	1.241	1.21	0.0438406	1.439	1.489	1.464	1.464	0.0353553
	minus-blank	0.075	0.138	0.259	0.212	0.428			16	0.27	0.277	0.2735	0.00494975	0.686	0.583	0.6345	0.072832	1.106	1.091	1.0985	0.0106066	1.183	1.199	1.191	0.0113137	1.378	1.39	1.384	1.378	0.00848528
	#2	0.157	0.231	0.302	0.279	0.502
	minus-blank	0.112	0.186	0.257	0.234	0.457
	average	0.0935	0.162	0.258	0.223	0.4425
5	#1	0.157	0.318	0.387	0.426	0.687
	minus-blank	0.112	0.273	0.342	0.381	0.642
	#2	0.173	0.345	0.421	0.447	0.666
	minus-blank	0.128	0.3	0.376	0.402	0.621
	average	0.12	0.2865	0.359	0.3915	0.6315
6	#1	0.169	0.473	0.55	0.59	0.826
	minus-blank	0.124	0.428	0.505	0.545	0.781
	#2	0.187	0.491	0.569	0.606	0.781
	minus-blank	0.142	0.446	0.524	0.561	0.736
	average	0.133	0.437	0.5145	0.553	0.7585
7	#1	0.181	0.604	0.743	0.737	1.064
	minus-blank	0.136	0.559	0.698	0.692	1.019
	#2	0.191	0.636	0.706	0.793	1.077
	minus-blank	0.146	0.591	0.661	0.748	1.032
	average	0.141	0.575	0.6795	0.72	1.0255
8	#1	0.219	0.729	0.857	0.859	1.148
	minus-blank	0.174	0.684	0.812	0.814	1.103
	#2	0.235	0.742	0.824	0.909	1.172
	minus-blank	0.19	0.697	0.779	0.864	1.127
	average	0.182	0.6905	0.7955	0.839	1.115
9	#1	0.251	0.791	0.933	0.964	1.212
	minus-blank	0.206	0.746	0.888	0.919	1.167
	#2	0.268	0.786	0.923	0.957	1.26
	minus-blank	0.223	0.741	0.878	0.912	1.215
	average	0.2145	0.7435	0.883	0.9155	1.191
10	#1	0.262	0.825	1.021	0.998	1.28
	minus-blank	0.217	0.78	0.976	0.953	1.235
	#2	0.285	0.842	1.009	0.995	1.337
	minus-blank	0.24	0.797	0.964	0.95	1.292
	average	0.2285	0.7885	0.97	0.9515	1.2635
11	#1	0.288	0.874	1.081	1.041	1.333
	minus-blank	0.243	0.829	1.036	0.996	1.288
	#2	0.315	0.892	1.025	1.04	1.375
	minus-blank	0.27	0.847	0.98	0.995	1.33
	average	0.2565	0.838	1.008	0.9955	1.309
12	#1	0.322	0.895	1.134	1.112	1.377
	minus-blank	0.277	0.85	1.089	1.067	1.332
	#2	0.333	0.908	1.095	1.119	1.428
	minus-blank	0.288	0.863	1.05	1.074	1.383
	average	0.2825	0.8565	1.0695	1.0705	1.3575
13	#1	0.33	0.922	1.137	1.138	1.413
	minus-blank	0.285	0.877	1.092	1.093	1.368
	#2	0.334	0.923	1.147	1.136	1.465
	minus-blank	0.289	0.878	1.102	1.091	1.42
	average	0.287	0.8775	1.097	1.092	1.394
14	#1	0.339	0.889	1.163	1.177	1.454
	minus-blank	0.294	0.844	1.118	1.132	1.409
	#2	0.342	0.892	1.168	1.223	1.498
	minus-blank	0.297	0.847	1.123	1.178	1.453
	average	0.2955	0.8455	1.1205	1.155	1.431
15	#1	0.409	0.69	1.175	1.224	1.484
	minus-blank	0.364	0.645	1.13	1.179	1.439
	#2	0.412	0.662	1.177	1.286	1.534
	minus-blank	0.367	0.617	1.132	1.241	1.489
	average	0.3655	0.631	1.131	1.21	1.464
16	#1	0.315	0.731	1.151	1.228	1.423
	minus-blank	0.27	0.686	1.106	1.183	1.378
	#2	0.322	0.628	1.136	1.244	1.435
	minus-blank	0.277	0.583	1.091	1.199	1.39
	average	0.2735	0.6345	1.0985	1.191	1.384

## Sheet: S.A.
Table.1 OD600 of Hevb5 at difference concentration (dilute with 50 mM Tris-HCl pH 8.0) and Staphylococcus aureus time: 0 - 16 hrs
		concentration (uM)
hr		70	35	17.5	8.75	LB+bac	min	time (hrs)	S. aureus
0	#1	0.356	0.062	0.049	0.046	0.047	0.046		70				35				17.5				8.75				LB+bac
	#2	0.78	0.179	0.052	0.045	0.045	0.045		#1	#2	average	SD	#1	#2	average	SD	#1	#2	average	SD	#1	#2	average	SD	#1	#2	average	SD
1	#1	0.11	0.066	0.057	0.054	0.055		0	0	0	0	0	0	0	0	0	0	0	0	0	0	0	0	0	0	0	0	0
	minus-blank	0.064	0.02	0.011	0.008	0.009		1	0.064	0.055	0.0595	0.00636396	0.02	0.03	0.025	0.00707107	0.011	0.012	0.0115	0.000707107	0.008	0.008	0.008	0	0.009	0.007	0.008	0.00141421
	#2	0.1	0.075	0.057	0.053	0.052		2	0.099	0.114	0.1065	0.0106066	0.084	0.092	0.088	0.00565685	0.072	0.082	0.077	0.00707107	0.067	0.079	0.073	0.00848528	0.081	0.077	0.079	0.00282843
	minus-blank	0.055	0.03	0.012	0.008	0.007		3	0.122	0.132	0.127	0.00707107	0.137	0.117	0.127	0.0141421	0.103	0.12	0.1115	0.0120208	0.117	0.122	0.1195	0.00353553	0.145	0.168	0.1565	0.0162635
	average	0.0595	0.025	0.0115	0.008	0.008		4	0.133	0.136	0.1345	0.00212132	0.138	0.141	0.1395	0.00212132	0.156	0.166	0.161	0.00707107	0.188	0.185	0.1865	0.00212132	0.256	0.214	0.235	0.0296985
2	#1	0.145	0.13	0.118	0.113	0.127		5	0.132	0.148	0.14	0.0113137	0.18	0.184	0.182	0.00282843	0.223	0.24	0.2315	0.0120208	0.277	0.27	0.2735	0.00494975	0.32	0.323	0.3215	0.00212132
	minus-blank	0.099	0.084	0.072	0.067	0.081		6	0.142	0.145	0.1435	0.00212132	0.232	0.249	0.2405	0.0120208	0.289	0.31	0.2995	0.0148492	0.336	0.336	0.336	0	0.421	0.421	0.421	0
	#2	0.159	0.137	0.127	0.124	0.122		7	0.112	0.121	0.1165	0.00636396	0.289	0.306	0.2975	0.0120208	0.334	0.327	0.3305	0	0.366	0.374	0.37	0.00565685	0.578	0.547	0.5625	0.0219203
	minus-blank	0.114	0.092	0.082	0.079	0.077		8	0.107	0.128	0.1175	0.0148492	0.353	0.348	0.3505	0.00353553	0.379	0.365	0.372	0	0.409	0.403	0.406	0.00424264	0.65	0.643	0.6465	0.00494975
	average	0.1065	0.088	0.077	0.073	0.079		9	0.119	0.128	0.1235	0.00636396	0.475	0.475	0.475	0	0.398	0.397	0.3975	0	0.461	0.47	0.4655	0.00636396	0.768	0.759	0.7635	0.00636396
3	#1	0.168	0.183	0.149	0.163	0.191		10	0.129	0.132	0.1305	0.00212132	0.697	0.685	0.691	0.00848528	0.461	0.451	0.456	0	0.628	0.62	0.624	0.00565685	0.841	0.835	0.838	0.00424264
	minus-blank	0.122	0.137	0.103	0.117	0.145		11	0.136	0.139	0.1375	0.00212132	0.907	0.905	0.906	0.00141421	0.622	0.63	0.626	0	0.756	0.753	0.7545	0.00212132	0.937	0.949	0.943	0.00848528
	#2	0.177	0.162	0.165	0.167	0.213		12	0.136	0.136	0.136	0	1.174	1.172	1.173	0.00141421	0.991	0.979	0.985	0	1.106	1.112	1.109	0.00424264	1.121	1.11	1.1155	0.00777817
	minus-blank	0.132	0.117	0.12	0.122	0.168		13	0.111	0.111	0.111	0	1.335	1.35	1.3425	0.0106066	1.353	1.365	1.359	0	1.358	1.362	1.36	0.00282843	1.215	1.241	1.228	0.0183848
	average	0.127	0.127	0.1115	0.1195	0.1565		14	0.086	0.099	0.0925	0.00919239	1.524	1.542	1.533	0.0127279	1.789	1.768	1.7785	0.0148492	1.622	1.627	1.6245	0.00353553	1.386	1.404	1.395	0.0127279
4	#1	0.179	0.184	0.202	0.234	0.302		15	0.09	0.093	0.0915	0.00212132	1.38	1.395	1.3875	0.0106066	1.805	1.819	1.812	0	1.876	1.869	1.8725	0.00494975	1.506	1.517	1.5115	0.00777817
	minus-blank	0.133	0.138	0.156	0.188	0.256		16	0.084	0.09	0.087	0.00424264	1.366	1.376	1.371	0.00707107	1.835	1.831	1.833	0	2.029	2.017	2.023	0.00848528	1.635	1.659	1.647	0.0169706
	#2	0.181	0.186	0.211	0.23	0.259
	minus-blank	0.136	0.141	0.166	0.185	0.214
	average	0.1345	0.1395	0.161	0.1865	0.235
5	#1	0.178	0.226	0.269	0.323	0.366
	minus-blank	0.132	0.18	0.223	0.277	0.32
	#2	0.193	0.229	0.285	0.315	0.368
	minus-blank	0.148	0.184	0.24	0.27	0.323
	average	0.14	0.182	0.2315	0.2735	0.3215
6	#1	0.188	0.278	0.335	0.382	0.467
	minus-blank	0.142	0.232	0.289	0.336	0.421
	#2	0.19	0.294	0.355	0.381	0.466
	minus-blank	0.145	0.249	0.31	0.336	0.421
	average	0.1435	0.2405	0.2995	0.336	0.421
7	#1	0.158	0.335	0.38	0.412	0.624
	minus-blank	0.112	0.289	0.334	0.366	0.578
	#2	0.166	0.351	0.372	0.419	0.592
	minus-blank	0.121	0.306	0.327	0.374	0.547
	average	0.1165	0.2975	0.3305	0.37	0.5625
8	#1	0.153	0.399	0.425	0.455	0.696
	minus-blank	0.107	0.353	0.379	0.409	0.65
	#2	0.173	0.393	0.41	0.448	0.688
	minus-blank	0.128	0.348	0.365	0.403	0.643
	average	0.1175	0.3505	0.372	0.406	0.6465
9	#1	0.165	0.521	0.444	0.507	0.814
	minus-blank	0.119	0.475	0.398	0.461	0.768
	#2	0.173	0.52	0.442	0.515	0.804
	minus-blank	0.128	0.475	0.397	0.47	0.759
	average	0.1235	0.475	0.3975	0.4655	0.7635
10	#1	0.175	0.743	0.507	0.674	0.887
	minus-blank	0.129	0.697	0.461	0.628	0.841
	#2	0.177	0.73	0.496	0.665	0.88
	minus-blank	0.132	0.685	0.451	0.62	0.835
	average	0.1305	0.691	0.456	0.624	0.838
11	#1	0.182	0.953	0.668	0.802	0.983
	minus-blank	0.136	0.907	0.622	0.756	0.937
	#2	0.184	0.95	0.675	0.798	0.994
	minus-blank	0.139	0.905	0.63	0.753	0.949
	average	0.1375	0.906	0.626	0.7545	0.943
12	#1	0.182	1.22	1.037	1.152	1.167
	minus-blank	0.136	1.174	0.991	1.106	1.121
	#2	0.181	1.217	1.024	1.157	1.155
	minus-blank	0.136	1.172	0.979	1.112	1.11
	average	0.136	1.173	0.985	1.109	1.1155
13	#1	0.157	1.381	1.399	1.404	1.261
	minus-blank	0.111	1.335	1.353	1.358	1.215
	#2	0.156	1.395	1.41	1.407	1.286
	minus-blank	0.111	1.35	1.365	1.362	1.241
	average	0.111	1.3425	1.359	1.36	1.228
14	#1	0.132	1.57	1.835	1.668	1.432
	minus-blank	0.086	1.524	1.789	1.622	1.386
	#2	0.144	1.587	1.813	1.672	1.449
	minus-blank	0.099	1.542	1.768	1.627	1.404
	average	0.0925	1.533	1.7785	1.6245	1.395
15	#1	0.136	1.426	1.851	1.922	1.552
	minus-blank	0.09	1.38	1.805	1.876	1.506
	#2	0.138	1.44	1.864	1.914	1.562
	minus-blank	0.093	1.395	1.819	1.869	1.517
	average	0.0915	1.3875	1.812	1.8725	1.5115
16	#1	0.13	1.412	1.881	2.075	1.681
	minus-blank	0.084	1.366	1.835	2.029	1.635
	#2	0.135	1.421	1.876	2.062	1.704
	minus-blank	0.09	1.376	1.831	2.017	1.659
	average	0.087	1.371	1.833	2.023	1.647

## Sheet: S.T.
Table.1 OD600 of Hevb5 at difference concentration (dilute with 50 mM Tris-HCl pH 8.0) and Salmonella typhi time: 0 - 16 hrs
		concentration (uM)
hr		70	35	17.5	8.75	LB+bac	min		time (hrs)	S. typhi
0	#1	0.16	0.061	0.051	0.047	0.046	0.046			70				35				17.5				8.75				LB+bac
	#2	1.206	0.253	0.052	0.478	0.048	0.048			#1	#2	average	SD	#1	#2	average	SD	#1	#2	average	SD	#1	#2	average	SD	#1	#2	average	SD
1	#1	0.083	0.067	0.058	0.054	0.055			0	0	0	0	0	0	0	0	0	0	0	0	0	0	0	0	0	0	0	0	0
	minus-blank	0.037	0.021	0.012	0.008	0.009			1	0.037	0.034	0.0355	0.00212132	0.021	0.027	0.024	0.00424264	0.012	0.013	0.0125	0.000707107	0.008	0.007	0.0075	0.000707107	0.009	0.006	0.0075	0.00212132
	#2	0.082	0.075	0.061	0.055	0.054			2	0.034	0.036	0.035	0.00141421	0.025	0.028	0.0265	0.00212132	0.035	0.032	0.0335	0.00212132	0.043	0.04	0.0415	0.00212132	0.086	0.081	0.0835	0.00353553
	minus-blank	0.034	0.027	0.013	0.007	0.006			3	0.087	0.084	0.0855	0.00212132	0.112	0.083	0.0975	0.0205061	0.129	0.116	0.1225	0.00919239	0.146	0.132	0.139	0.00989949	0.154	0.153	0.1535	0.000707107
	average	0.0355	0.024	0.0125	0.0075	0.0075			4	0.099	0.094	0.0965	0.00353553	0.137	0.085	0.111	0.0367696	0.193	0.229	0.211	0.0254558	0.231	0.277	0.254	0.0325269	0.25	0.253	0.2515	0.00212132
2	#1	0.08	0.071	0.081	0.089	0.132			5	0.112	0.108	0.11	0.00282843	0.108	0.107	0.1075	0.000707107	0.304	0.469	0.3865	0.116673	0.343	0.346	0.3445	0.00212132	0.398	0.441	0.4195	0.0304056
	minus-blank	0.034	0.025	0.035	0.043	0.086			6	0.106	0.107	0.1065	0.000707107	0.105	0.099	0.102	0.00424264	0.452	0.449	0.4505	0.00212132	0.445	0.45	0.4475	0.00353553	0.519	0.518	0.5185	0.000707107
	#2	0.084	0.076	0.08	0.088	0.129			7	0.099	0.1	0.0995	0.000707107	0.084	0.089	0.0865	0.00353553	0.659	0.664	0.6615	0.00353553	0.552	0.547	0.5495	0.00353553	0.66	0.673	0.6665	0.00919239
	minus-blank	0.036	0.028	0.032	0.04	0.081			8	0.098	0.1	0.099	0.00141421	0.1	0.09	0.095	0.00707107	0.983	0.98	0.9815	0.00212132	0.729	0.724	0.7265	0.00353553	0.729	0.761	0.745	0.0226274
	average	0.035	0.0265	0.0335	0.0415	0.0835			9	0.104	0.095	0.0995	0.00636396	0.108	0.096	0.102	0.00848528	1.35	1.341	1.3455	0.00636396	1.655	1.662	1.6585	0.00494975	0.799	0.782	0.7905	0.0120208
3	#1	0.133	0.158	0.175	0.192	0.2			10	0.174	0.176	0.175	0.00141421	0.103	0.089	0.096	0.00989949	1.443	1.43	1.4365	0.00919239	1.619	1.618	1.6185	0.000707107	0.902	0.864	0.883	0.0268701
	minus-blank	0.087	0.112	0.129	0.146	0.154			11	0.084	0.071	0.0775	0.00919239	0.08	0.077	0.0785	0.00212132	1.515	1.492	1.5035	0.0162635	1.673	1.666	1.6695	0.00494975	1.135	1.132	1.1335	0.00212132
	#2	0.132	0.131	0.164	0.18	0.201			12	0.088	0.087	0.0875	0.000707107	0.101	0.085	0.093	0.0113137	1.522	1.515	1.5185	0.00494975	1.716	1.725	1.7205	0.00636396	1.507	1.503	1.505	0.00282843
	minus-blank	0.084	0.083	0.116	0.132	0.153			13	0.089	0.073	0.081	0.0113137	0.107	0.079	0.093	0.019799	1.636	1.627	1.6315	0.00636396	1.762	1.759	1.7605	0.00212132	1.559	1.548	1.5535	0.00777817
	average	0.0855	0.0975	0.1225	0.139	0.1535			14	0.089	0.074	0.0815	0.0106066	0.111	0.076	0.0935	0.0247487	1.666	1.664	1.665	0.00141421	1.713	1.712	1.7125	0.000707107	1.588	1.581	1.5845	0.00494975
4	#1	0.145	0.183	0.239	0.277	0.296			15	0.088	0.072	0.08	0.0113137	0.111	0.078	0.0945	0.0233345	1.681	1.695	1.688	0.00989949	1.739	1.734	1.7365	0.00353553	1.575	1.576	1.5755	0.000707107
	minus-blank	0.099	0.137	0.193	0.231	0.25			16	0.081	0.061	0.071	0.0141421	0.066	0.063	0.0645	0.00212132	1.651	1.645	1.648	0.00424264	1.642	1.631	1.6365	0.00777817	1.654	1.655	1.6545	0.000707107
	#2	0.142	0.133	0.277	0.325	0.301
	minus-blank	0.094	0.085	0.229	0.277	0.253
	average	0.0965	0.111	0.211	0.254	0.2515
5	#1	0.158	0.154	0.35	0.389	0.444
	minus-blank	0.112	0.108	0.304	0.343	0.398
	#2	0.156	0.155	0.517	0.394	0.489
	minus-blank	0.108	0.107	0.469	0.346	0.441
	average	0.11	0.1075	0.3865	0.3445	0.4195
6	#1	0.152	0.151	0.498	0.491	0.565
	minus-blank	0.106	0.105	0.452	0.445	0.519
	#2	0.155	0.147	0.497	0.498	0.566
	minus-blank	0.107	0.099	0.449	0.45	0.518
	average	0.1065	0.102	0.4505	0.4475	0.5185
7	#1	0.145	0.13	0.705	0.598	0.706
	minus-blank	0.099	0.084	0.659	0.552	0.66
	#2	0.148	0.137	0.712	0.595	0.721
	minus-blank	0.1	0.089	0.664	0.547	0.673
	average	0.0995	0.0865	0.6615	0.5495	0.6665
8	#1	0.144	0.146	1.029	0.775	0.775
	minus-blank	0.098	0.1	0.983	0.729	0.729
	#2	0.148	0.138	1.028	0.772	0.809
	minus-blank	0.1	0.09	0.98	0.724	0.761
	average	0.099	0.095	0.9815	0.7265	0.745
9	#1	0.15	0.154	1.396	1.701	0.845
	minus-blank	0.104	0.108	1.35	1.655	0.799
	#2	0.143	0.144	1.389	1.71	0.83
	minus-blank	0.095	0.096	1.341	1.662	0.782
	average	0.0995	0.102	1.3455	1.6585	0.7905
10	#1	0.22	0.149	1.489	1.665	0.948
	minus-blank	0.174	0.103	1.443	1.619	0.902
	#2	0.224	0.137	1.478	1.666	0.912
	minus-blank	0.176	0.089	1.43	1.618	0.864
	average	0.175	0.096	1.4365	1.6185	0.883
11	#1	0.13	0.126	1.561	1.719	1.181
	minus-blank	0.084	0.08	1.515	1.673	1.135
	#2	0.119	0.125	1.54	1.714	1.18
	minus-blank	0.071	0.077	1.492	1.666	1.132
	average	0.0775	0.0785	1.5035	1.6695	1.1335
12	#1	0.134	0.147	1.568	1.762	1.553
	minus-blank	0.088	0.101	1.522	1.716	1.507
	#2	0.135	0.133	1.563	1.773	1.551
	minus-blank	0.087	0.085	1.515	1.725	1.503
	average	0.0875	0.093	1.5185	1.7205	1.505
13	#1	0.135	0.153	1.682	1.808	1.605
	minus-blank	0.089	0.107	1.636	1.762	1.559
	#2	0.121	0.127	1.675	1.807	1.596
	minus-blank	0.073	0.079	1.627	1.759	1.548
	average	0.081	0.093	1.6315	1.7605	1.5535
14	#1	0.135	0.157	1.712	1.759	1.634
	minus-blank	0.089	0.111	1.666	1.713	1.588
	#2	0.122	0.124	1.712	1.76	1.629
	minus-blank	0.074	0.076	1.664	1.712	1.581
	average	0.0815	0.0935	1.665	1.7125	1.5845
15	#1	0.134	0.157	1.727	1.785	1.621
	minus-blank	0.088	0.111	1.681	1.739	1.575
	#2	0.12	0.126	1.743	1.782	1.624
	minus-blank	0.072	0.078	1.695	1.734	1.576
	average	0.08	0.0945	1.688	1.7365	1.5755
16	#1	0.127	0.112	1.697	1.688	1.7
	minus-blank	0.081	0.066	1.651	1.642	1.654
	#2	0.109	0.111	1.693	1.679	1.703
	minus-blank	0.061	0.063	1.645	1.631	1.655
	average	0.071	0.0645	1.648	1.6365	1.6545
