# Supplementary material for: The acidic latex protein from Hevea brasiliensis serves as an anionic antimicrobial peptide
Source: PeerJ. 2025 Apr 14;13:e19242. doi: 10.7717/peerj.19242 (PMC12005194; doi:10.7717/peerj.19242)
Supplement: Supplemental Information 2 [file peerj-13-19242-s002.xlsx]

## Sheet: Sheet1
Bacteria	Sample	#1	#2	#3	log#1	log#2	log#3	log average	log SD	SD
B. cereus	Positive	10	20	10	1	1.30103	1	1.10034	0.1738	5.7735
	Negative	8800000000	7900000000	9200000000	9.94448	9.89763	9.96379	9.9353	0.034023	6.65833e+08
	0.5 mg/ml rHevb5	360000	320000	370000	5.5563	5.50515	5.5682	5.54322	0.0335005	26457.5
E. coli	Positive	20	20	10	1.30103	1.30103	1	1.20069	0.1738	5.7735
	Negative	24500000000	24500000000	24500000000	10.3892	10.3892	10.3892	10.3892	0	0
	0.5 mg/ml rHevb5	1070000	970000	980000	6.02938	5.98677	5.99123	6.00246	0.0234223	55075.7
S. aureus	Positive	10	0	10	1	0	1	0.666667	0.57735	5.7735
	Negative	15200000000	12900000000	13800000000	10.1818	10.1106	10.1399	10.1441	0.0358143	1.15902e+09
	0.5 mg/ml rHevb5	1700	1800	1900	3.23045	3.25527	3.27875	3.25483	0.0241554	100
S. Typhi	Positive	0	10	20	0	1	1.30103	0.76701	0.68109	10
	Negative	16900000000	16500000000	18100000000	10.2279	10.2175	10.2577	10.2343	0.0208622	8.32666e+08
	0.5 mg/ml rHevb5	1750000	1810000	1830000	6.24304	6.25768	6.26245	6.25439	0.0101159	41633.3
neg: 50 mM Tris-HCl pH 8.0
pos: ampicillin
